## 1 **Transcriptional heterogeneity of stemness phenotypes in the ovarian epithelium**

2 Carter, LE.\*<sup>1,2</sup>, Cook, DP.\*<sup>1,2</sup>, McCloskey, CW.<sup>1,2</sup>, Dang, T.<sup>1</sup>, Collins, O.<sup>1,2</sup>, Gamwell, LF.<sup>1,2</sup>,

3 Dempster, HA.<sup>1,2</sup>, Vanderhyden, BC.<sup>1,2</sup>

4 \* Authors contributed equally

5 1. Cancer Therapeutics Program, Ottawa Hospital Research Institute, Ottawa, ON,  
6 Canada.

7 2. Department of Cellular and Molecular Medicine, University of Ottawa, Ottawa,  
8 ON, Canada.

9 Correspondence: Dr. Barbara Vanderhyden (bvanderhyden@ohri.ca)

## 10 **Abstract**

11 The ovarian surface epithelium (OSE) is a monolayer of epithelial cells covering the surface of  
12 the ovary. During ovulation, the OSE is ruptured to allow release of the oocyte. This wound is  
13 quickly repaired, but mechanisms of this repair are poorly understood. The contribution of  
14 tissue-resident stem cells in the homeostasis of several epithelial tissues is widely accepted,  
15 such as the intestinal epithelium, airway epithelium, and skin, but their involvement in OSE  
16 maintenance is unclear. While putative stem cell populations in the OSE have been described,  
17 how they are regulated is poorly defined. We show that traits associated with stem cells  
18 (stemness) can be increased in OSE following exposure to the cytokine TGF $\beta$ 1, overexpression  
19 of the transcription factor *Snai1*, or deletion of *Brca1*. By assessing the gene expression profiles  
20 of these populations, we show that stemness is often linked to mesenchymal-associated gene  
21 expression and higher activation of ERK signalling, but it is not consistently dependent on their  
22 activation. Expression profiles of these populations are extremely context specific, suggesting  
23 that stemness may not correspond to a single, distinct population, but rather is a heterogenous  
24 state that can possibly emerge from diverse environmental cues. Together, these findings  
25 support that the OSE may not require distinct stem cell populations for long-term maintenance,  
26 and may achieve this through transient dedifferentiation into a stem-like state.

## 27 **Introduction**

28 It is thought that stem cell populations are responsible for long-term maintenance of many adult  
29 tissues. The characterization of stem cells associated with epithelial tissues has been an active  
30 field of research for the past few decades. While several distinct stem cell populations have  
31 been described, such as an LGR5+ population at the base of intestinal crypts<sup>1</sup>, it is unclear if all  
32 epithelial tissues are maintained by such a defined population. For example, it has been shown  
33 that following stem cell depletion, differentiated airway epithelial cells can dedifferentiate and  
34 become functional multipotent stem cells<sup>2</sup>. It is also unclear if stem cells are necessarily  
35 required to maintain epithelial tissues comprising a single cell type, as some baseline capacity  
36 for proliferation could maintain the entire tissue. In the mesothelium, for example, there have

37 been reports of putative stem/progenitor cells for over two decades, but a well-defined stem cell  
38 population has yet to be identified<sup>3</sup>.

39 The ovarian surface epithelium (OSE) is a promising tissue for studying stemness dynamics in  
40 tissue maintenance. It is a monolayer of cells surrounding the ovary and, during each ovulation,  
41 this tissue is ruptured to facilitate release of an oocyte. Afterwards, the OSE layer is rapidly  
42 repaired<sup>4-7</sup>. Post-ovulatory wound repair is a poorly understood process despite ovulation being  
43 a major non-hereditary risk factor for ovarian cancer.

44 Several putative OSE stem cell populations have been described, each defined by different cell  
45 surface markers, including ALDH1A1, LGR5, LY6A (Sca-1), and more<sup>8-11</sup>. The relationships  
46 between populations described in these studies are still unclear. Further, it is unclear if these  
47 populations are static or can emerge from differentiated OSE in response to ovarian dynamics.  
48 We have previously shown that, like the mammary epithelium<sup>12</sup>, induction of an  
49 epithelial-to-mesenchymal transition (EMT) can transiently promote features of stem cells  
50 (stemness) in differentiated OSE<sup>10</sup>. This is particularly relevant in the context of ovulation, as the  
51 EMT is thought to be an important component of wound repair and the EMT-promoting cytokine  
52 TGFB1 is present in follicular fluid, bathing adjacent OSE at ovulation<sup>10,13</sup>. It is also secreted by  
53 macrophages at the ovulatory wound and granulosa cells during follicular development<sup>14,15</sup>.

54 Here, we further demonstrate that features of stemness can be enhanced in OSE cells. Profiling  
55 gene expression of different populations with enhanced stemness, we demonstrate that some  
56 features are relatively common, including EMT-associated expression patterns and higher  
57 activity of ERK and NFkB signalling, but global expression profiles are widely variable and  
58 stemness isn't exclusively dependent on these common features. Together, this work supports  
59 that OSE tissue maintenance may not require a distinct stem cell population, but can emerge in  
60 response to their environment. Further, different environmental conditions can give rise to  
61 stem-like populations with different characteristics.

## 62 **Results**

### 63 **CD44 is a marker of EMT-associated stemness in OSE cells**

64 We have previously demonstrated that mouse OSE (mOSE) cells undergo an EMT and acquire  
65 stem cell characteristics when exposed to TGFB1<sup>10,16</sup>. To confirm these findings, we first  
66 assessed the ability of TGFB1-treated mOSE cells to form self-renewing spheroids in  
67 suspension culture. Treated cells formed over twice as many primary spheroids and, when  
68 dissociated and cultured, were more efficient at successfully generating secondary spheroids,  
69 confirming their ability to self-renew (**Fig. 1a**). Morphologically, mOSE spheres were large and  
70 compact, regardless of whether they had been treated (**Fig. 1b**). To validate this enhanced  
71 stemness in human cells, we performed these experiments on primary cultures of human OSE  
72 (hOSE) cells. These cultures have a low proliferation rate *in vitro*, so to minimize the impact of  
73 aggregation in our quantifications, we used methylcellulose-based suspension culture to  
74 immobilize the cells. While these conditions, along with the slower proliferation, resulted in

75 smaller spheroids, TGFB1-treated hOSE cells formed 3 times as many spheroids as untreated  
76 cells (**Fig 1c**).

77 To determine if this enhanced stemness is associated with the expression of previously reported  
78 markers of OSE stem cells, we measured their expression throughout TGFB1 treatment in  
79 mOSE cells. *Aldh1a1*, *Lgr5*, and *Nanog* did not increase throughout a week of treatment, and in  
80 some cases even decreased over time (**Supplementary Fig. 1**). While this does not preclude  
81 the possibility of these genes being valid markers of stem cell populations *in vivo*, these results  
82 suggest that their regulation is independent from TGFB1-associated stemness.

83 To identify putative markers that are associated with this stemness, we assessed the expression  
84 of a larger panel of markers from a commercial “Stem Cell Marker” qPCR array (**Fig. 1d**). This  
85 identified several highly upregulated markers following 7 days of TGFB1 treatment, including  
86 *Ncam1* (14-fold), *Cd44* (13-fold), and *Ascl2* (6-fold) (**Fig. 1d**). CD44 has long been associated  
87 with stemness in mammary epithelial cells<sup>17</sup> and more recently in the oviductal epithelium<sup>18</sup>. To  
88 determine if CD44 can be used as a selective marker to enrich for stem cell characteristics, we  
89 first validated that TGFB1 increases CD44 protein levels in mOSE cells (**Fig. 1e**;  
90 **Supplementary Fig. 2**) and then sorted CD44<sup>high</sup> cells from TGFB1-treated mOSE by  
91 fluorescence-activated cell sorting (FACS). When placed in suspension culture, CD44<sup>high</sup> cells  
92 formed approximately 2.5 times as many spheroids (**Fig. 1f**).

### 93 **Transcriptional profiling of mOSE stemness**

94 We next sought to define a global profile of stemness, beyond a small number of markers.  
95 Spheroids themselves have been demonstrated to be enriched with stem/progenitor  
96 populations<sup>19–21</sup>. Since untreated mOSE cultures are capable of sphere formation, albeit at a  
97 lower frequency than TGFB1-treated mOSE cells, we reasoned that the transcriptional profile of  
98 these spheroids may represent an intrinsic stemness program, independent from exogenous  
99 factors. To compare this with TGFB1-induced stemness, we performed RNA-seq on mOSE cells  
100 cultured as a monolayer or as spheroids, each with and without TGFB1 treatment.

101 Untreated mOSE cells cultured as spheroids exhibited striking differences from those cultured in  
102 a monolayer, with 4950 differentially expressed genes between the conditions ( $p < 0.05$ ,  
103 absolute log fold change  $> 0.5$ ) (**Fig. 2a**; **Supplemental Data 1**). Using an aggregate reference  
104 of GO terms, KEGG pathways, Reactome pathways, and MSigDB Hallmark gene sets from the  
105 Molecular Signatures Database (MSigDB)<sup>22,23</sup>, we used gene set enrichment analysis (GSEA)  
106 to identify biological features associated with these changes (**Fig. 2c**; **Supplemental Data 2**).  
107 Spheroids were associated with decreased cell cycle, epithelial cell adhesion and, interestingly,  
108 DNA repair. Along with these changes, spheroid culture activated expression of chemokine  
109 signalling and wound repair programs. We also note that CD44, which we had used as a  
110 selection marker for stemness in TGFB1-treated mOSE, was also expressed over 4-fold higher  
111 in spheroids, whereas *Aldh1a1*, *Lgr5*, and *Ly6a* (*Sca-1*) were unchanged (**Fig. 2b**). We next  
112 used the PROGENy algorithm to infer changes in signalling pathway activity across these  
113 samples that may be contributing to these differences. Spheroids were associated with

114 increased activity of many signalling pathways, with the largest increases in Hypoxia, NFkB, and  
115 MAPK signalling (**Fig 2d**). While GSEA results suggest several EMT-related changes, TGFB1  
116 and WNT signalling are interestingly reduced, suggesting that this EMT program may be  
117 activated through NFkB or ERK (**Fig 2d**).

118 While TGFB1 signalling was decreased in untreated spheroids, exogenous TGFB1 treatment  
119 enhanced stemness, increasing the proportion of cells capable of forming self-renewing  
120 spheroids. While these results are seemingly contradictory, week-long exposure to exogenous  
121 TGFB1 may activate similar expression programs through secondary effects or signalling  
122 crosstalk<sup>24</sup>. We next assessed expression changes associated with TGFB1 exposure.  
123 Week-long treatment of monolayer cultures resulted in 1508 differentially expressed genes ( $p <$   
124  $0.05$ , absolute log fold change  $> 0.5$ ) (**Fig. 3a; Supplemental Data 3**). This involved the  
125 activation of EMT-associated gene sets as expected, as well as a reduction in oxidative  
126 phosphorylation (**Fig. 3b; Supplemental Data 4**). While TGFB1 signalling was the only pathway  
127 inferred to have significantly altered activity, the estimated activity of EGFR and MAPK was  
128 higher in TGFB1-treated cells ( $p = 0.1$  and  $0.06$ , respectively) (**Fig. 3c**). Consistent with this, the  
129 GO term “ERK1 and ERK2 signalling cascade” was significantly enriched in upregulated genes  
130 following TGFB1 treatment (**Fig. 3b**).

131 This suggests that TGFB1 treatment initiates sequential or parallel signals similar to those  
132 present in spheroids. Consistent with this, untreated spheroids and TGFB1-treated mOSE  
133 monolayers have a significant overlap in expression changes relative to untreated mOSE cells  
134 cultured as a monolayer, sharing 270 upregulated genes and 293 downregulated genes (Fisher  
135 exact  $p = 3.0e-66$  and  $2.8e-117$ , respectively) (**Fig. 3d**). Conserved upregulated genes were  
136 strongly enriched for EMT-associated genes, NFkB signalling, and angiogenesis (**Fig. 3e**).  
137 Interestingly, very few gene sets were enriched in the conserved downregulated genes, with  
138 only interferon response and substrate adhesion genes being enriched (**Fig. 3e**). Together, this  
139 suggests that OSE stemness may involve higher activities of ERK and NFkB signalling and an  
140 associated reduction in typical epithelial traits.

#### 141 **Snail activation promotes a unique stemness program in mOSE cells**

142 Signalling pathways are highly pleiotropic and it is unclear if TGFB1-enhanced stemness is  
143 activated from core EMT regulatory networks or alternative components regulated by TGFB1.  
144 The EMT transcription factor *Snai1* (Snail) was upregulated in both TGFB1-treated mOSE cells  
145 and spheroids, so to test if EMT activation without exogenous cytokines could promote  
146 stemness, we derived mOSE cell lines with doxycycline-inducible Snail expression. Following  
147 Snail induction, cells had a higher sphere forming capacity than cells without doxycycline  
148 exposure, generating up to twice as many primary spheres and 3 times as many secondary  
149 spheres when passaged (**Fig. 4a**).

150 We next assessed the expression of the putative stem cell markers *Cd44* and *Sca-1*, which are  
151 both increased with TGFB1 treatment, and found that Snail induction had no effect on their  
152 expression, suggesting that their validity as markers of stemness may be context specific. To

153 determine if Snail induction activates similar expression patterns to TGFB1-treated mOSE and  
154 spheroids, including higher ERK and NFkB activity, we performed RNA-seq on these cells with  
155 and without doxycycline. Snail-induced changes were more modest than with TGFB1 treatment  
156 or in spheroid culture, with only 85 upregulated and 44 downregulated genes ( $p < 0.05$ , absolute  
157 log fold change  $> 0.5$ ; **Fig. 4b; Supplemental Data 5**). Interestingly, inferred pathway activity  
158 scores associated with EGFR, NFkB, MAPK, and TGFB1 were all unchanged following Snail  
159 induction (**Fig. 4c**). Further, no relevant gene sets associated with these pathways were  
160 enriched in the differentially expressed genes (**Fig. 4d**). The only gene sets associated with  
161 upregulated genes were largely related to cell morphology and extracellular matrix (ECM)  
162 remodelling (**Fig. 4d; Supplemental Data 6**). Consistent with TGFB1-treated mOSE and  
163 spheroids, the MSigDB Hallmark “Interferon Alpha Response” was the only gene set enriched in  
164 the downregulated genes following Snail induction (**Fig. 4d**). We note that of the 85 upregulated  
165 genes following Snail induction, 13 are shared with those commonly regulated in TGFB1  
166 treatment and spheroids (**Fig. 4e**). These genes largely represent components of the ECM,  
167 including *Col18a1* and the metalloproteinases *Mmp9* and *Adamts4*. As the conditions share no  
168 consistently activated downstream signal that could be induced by ECM changes, these findings  
169 suggest that expression programs associated with stemness phenotypes are heterogeneous.  
170 Given frequent enrichment of gene sets associated with a mesenchymal phenotype, stemness  
171 may consistently involve higher levels of these traits, which can emerge from variable  
172 expression patterns<sup>25</sup>.

### 173 **BRCA1 loss promotes EMT-independent stemness in mOSE**

174 Spheroids were associated with higher expression of many genes that were not affected by  
175 TGFB1. We noted that among these were several changes typically associated with ovarian  
176 cancer, including activation of the transcription factor *Pax8*, which is present in approximately  
177 80% of ovarian tumors but not typically expressed in the OSE<sup>26</sup>; activation of *Greb1*, which  
178 promotes ovarian cancer growth<sup>27</sup>; and loss of *Brca1*, which, along with *Brca2*, is mutated in  
179 approximately 22% of high-grade serous ovarian tumours. Interestingly, loss of BRCA1 has  
180 been associated with promoting dedifferentiation and activation of EMT expression patterns in  
181 mammary epithelial cells<sup>28</sup>.

182 As the association between BRCA1 loss and stemness in the OSE had not been assessed, we  
183 next derived a primary mOSE line from *Brca1<sup>tm1Brn</sup>* mice harboring floxed *Brca1* alleles. To  
184 determine if BRCA1 loss enhanced stemness in these cells, we infected the cells with  
185 adenovirus containing either Cre recombinase (Ad-Cre) or GFP (Ad-GFP) as a control. Cre  
186 delivery, while not perfectly efficient, resulted in an approximately 60% reduction in BRCA1  
187 levels across the population (**Supplemental Fig. 3**). When placed in suspension culture, cells  
188 with reduced BRCA1 formed over 5 times as many primary spheres and 3 times as many  
189 secondary spheres than control mOSE cells, suggesting that BRCA1 loss also enhances  
190 stemness in mOSE cells (**Fig. 5a**). These findings also support our previous finding that the  
191 expression of putative stemness markers may be context specific.



192 To assess if BRCA1 loss enhances stemness phenotypes *in vivo*, we crossed the *Brca1<sup>tm1Brn</sup>*  
193 mice with *B6.129X1-Gt(ROSA)26Sor<sup>tm1(EYFP)Cos/J</sup>* mice to generate a *Brca1<sup>fl/fl</sup>YFP* mouse line,  
194 allowing us to track *Brca1*-null cells following exposure to Ad-Cre. These mice were injected  
195 intrabursally (IB) with Ad-Cre or PBS, and injected intraperitoneally (IP) with bromodeoxyuridine  
196 (BrdU). Ovaries were collected after a 30 day chase period and assessed for retention of the  
197 BrdU label and activation of the YFP reporter. Ad-Cre injection IB in *Brca1<sup>fl/fl</sup>YFP* mice showed  
198 successful activation of the YFP reporter, compared to the PBS injection (**Fig. 5b**). When  
199 combining the IB injections with an IP BrdU injection, Ad-Cre treatment increased the number of  
200 label-retaining OSE cells (**Fig. 5c,d**). This increased label retention further supports that BRCA1  
201 loss can expand or induce populations of stem-like cells in the OSE.

202 To determine if BRCA1 loss results in similar expression patterns to other conditions associated  
203 with stemness, we performed RNA-seq on mOSE cells isolated from these mice infected with  
204 Ad-Cre or Ad-GFP. BRCA1 loss resulted in a large shift in gene expression, with 1499  
205 significantly upregulated genes and 1881 downregulated ( $p < 0.05$ , absolute log fold change  $>$   
206 0.5; **Fig. 6a; Supplemental Data 7**). In mammary epithelium, the induction of EMT through  
207 *Brca1* deletion was presumed to be due to loss of BRCA1-mediated repression on the promoter  
208 of the EMT transcription factor *Twist1*. In contrast, we found that *Twist1* was approximately  
209 8-fold lower in *Brca1*-null mOSE cells (**Fig. 6a**). There were also no EMT-associated gene sets  
210 enriched in upregulated genes. Rather, upregulated genes were largely enriched for gene sets  
211 associated with cell membrane transporters and downregulated genes were associated with cell  
212 cycle, oxidative phosphorylation, and DNA repair (**Fig. 6b; Supplemental Data 8**). *Brca1*  
213 deletion did not result in other features of stemness we observed in previous conditions,  
214 including activation of ERK and NFkB, and repression of interferon alpha response genes (**Fig.**  
215 **6c**). *Brca1*-null cells were associated with reduced PI3K signalling and higher levels of estrogen  
216 signalling (**Fig. 6c**). Estrogen has been linked to EMT and stemness in other cell types<sup>29</sup>, but  
217 this is presumed to be through crosstalk, activating growth factor signalling pathways, which we  
218 do not see in *Brca1*-null OSE cells.

219 Comparing the expression profiles of each condition associated with stemness phenotypes in  
220 this study, we find minimal overlap in the specific genes activated or repressed in each (**Fig.**  
221 **6d**). Ranking genes by the number of conditions they are activated or repressed in, we found  
222 that *Adamts4* and *Pnmal2* are the only genes upregulated in all four conditions (**Fig. 6e**).  
223 *Adamts4* has been linked to stemness in uveal melanoma through modulating crosstalk  
224 between the cells and their adjacent ECM<sup>30</sup>. While this may be relevant here, conserved  
225 downstream signals promoting stemness remain elusive. We note high frequency of  
226 EMT-associated changes, including activation of Snail, various collagens, and repression of  
227 cytokeratins (**Fig. 6e**). Notably, however, specific EMT transcription factors and putative OSE  
228 stemness markers (*Lgr5*, *Aldh1a1*, *Ly6a*, *Nanog*, and *Cd44*) are only activated in 1-2 conditions,  
229 and are even repressed in some conditions (**Fig. 6e**).

## 230 Discussion

231 Several studies have reported putative stem cell populations in the OSE, but the relationships  
232 between these populations are unclear. The ability of differentiated epithelial cells to  
233 dedifferentiate and fulfil functional roles of stem cells has now been observed in several tissues,  
234 suggesting that static stem cell populations may not be required to maintain all tissues. In this  
235 study, we have further explored the ability of OSE cells to acquire features of stemness and  
236 have demonstrated it can be promoted by a variety of conditions. It may be expected that a  
237 common gene expression program would underlie the stemness phenotype, but we  
238 demonstrate that expression profiles are context-specific.

239 While transcriptional responses were variable, several patterns were recurrent across multiple  
240 conditions. We observed that induction of an EMT with TGFB1 treatment or Snail  
241 overexpression could promote stemness in OSE, but profiles of spheroids without cytokine  
242 treatment also showed EMT activation, which has also been seen with ovarian cancer cells<sup>31</sup>.  
243 As spheroid culture has been shown to enrich for cells with stem cell properties, these findings  
244 suggest that intrinsic stemness—independent of exogenous treatments—may be associated  
245 with a more mesenchymal phenotype. The relationship between the EMT and stemness is well  
246 documented<sup>12,32</sup>, but there is growing evidence that stemness and EMT are not inextricably  
247 linked. For example, the EMT-promoted transcription factor PRRX1 suppresses stemness in  
248 breast cancer cells<sup>33</sup>. Further, transcriptional dynamics of the EMT have been shown to be  
249 highly context-specific, which explains why it does not consistently promote stemness<sup>25</sup>. Just as  
250 the EMT can occur without promoting stemness, we have shown that deletion of *Brca1*  
251 promotes stemness in OSE without activating any EMT-associated expression, including *Twist1*  
252 activation, which had been shown to drive stemness following *Brca1* deletion in mammary  
253 epithelial cells<sup>28</sup>. Instead, *Brca1* loss caused many changes in cell membrane transport and  
254 metabolic genes. While the mechanism of induced stemness following *Brca1* loss is unclear,  
255 this provides strong evidence that stemness is not dependent on a mesenchymal expression  
256 profile and is perhaps as context-specific as the EMT response<sup>25</sup>.

257 Several alterations in signalling pathway activity were also common across conditions. TGFB1  
258 treatment and spheroids were associated with higher levels of ERK activity, which have both  
259 been linked to stemness in epithelial<sup>34</sup> and carcinoma cells<sup>35</sup>. In EGF-free media,  
260 paracrine/autocrine signalling is established, maintaining ERK activity in stem cell populations of  
261 intestinal organoids<sup>35</sup>. While these mechanisms may contribute to stemness in OSE spheroids  
262 or those treated with TGFB1, increased ERK activity was not enhanced following Snail  
263 overexpression or *Brca1* loss. Similarly, a gene set comprising interferon alpha response genes  
264 was downregulated following spheroid culture, TGFB1 treatment, and Snail overexpression.  
265 While it is unlikely that interferon alpha itself was present, it is possible that various signalling  
266 pathways may affect common target genes. Consistent with this, disruption of type 1 interferon  
267 signalling promotes stemness in breast cancer cells<sup>36</sup>. None of these patterns, however, are  
268 consistent across all conditions, further supporting that mechanisms promoting stemness may  
269 vary considerably depending on environmental conditions (eg. ovulatory wound repair, tissue  
270 expansion during folliculogenesis, natural cell turnover).

271 While we have relied heavily on *in vitro* models here, this has enabled us to explore the ability of  
272 OSE cells to acquire stemness following various experimental perturbations. This suggests that  
273 differentiated epithelial cells may be capable of self-regulating tissue maintenance in response  
274 to environmental cues, such as tissue damage. The expression profiles of this emergent  
275 stemness may be variable, depending on the specific properties of the cells' microenvironment.  
276 This model is particularly interesting because it is a stark contrast to how stem cells and  
277 differentiation hierarchies have been viewed for the last several decades. The OSE is a  
278 promising tissue to explore this further as it undergoes regular rupture and repair throughout  
279 reproductive cycles, and is a simple tissue comprising a single cell type, which may be the most  
280 likely to exhibit this behavior. Designing strategies to monitor stemness dynamics *in vivo* will be  
281 critical to understand these behaviours in a normal physiological context.

## 282 **Methods**

### 283 **OSE cell isolation and culture**

284 The isolation and culture of mOSE cells was done as previously described<sup>10</sup>, in accordance with  
285 the guidelines of the Canadian Council on Animal Care and under a protocol approved by the  
286 University of Ottawa Animal Care Committee. Briefly, ovaries from randomly cycling female mice  
287 (FVB/N, 6 weeks old) were collected and incubated in 0.25% Trypsin/PBS (Invitrogen) (37 °C,  
288 5% CO<sub>2</sub>, 30 min) to facilitate OSE removal. mOSE cells were isolated by centrifugation and  
289 plated onto tissue culture plates (Corning) in mOSE media [ $\alpha$ -Minimum Essential Medium  
290 (Corning) supplemented with 4% FBS, 0.01 mg/mL insulin-transferrin-sodium-selenite solution  
291 (ITSS; Roche), and 2  $\mu$ g/mL EGF (R&D Systems)]. hOSE cells were isolated and cultured as  
292 previously described<sup>37</sup>, with patient consent and under a protocol approved by the Ottawa  
293 Health Science Network Research Ethics Board (Protocol #1999540). Briefly, ovaries from 5  
294 different women were collected during surgery for reasons other than ovarian pathology. Using a  
295 scalpel, hOSE cells were scraped from the ovarian surface and isolated by centrifugation in  
296 hOSE media (Wisent Bioproducts) supplemented with 10% FBS. All mouse and human OSE  
297 cells were passaged 2-3 times prior to experimental use and experiments were conducted with  
298 cells of a passage number less than 25.

### 299 **Quantitative reverse transcription polymerase chain reaction (RT-PCR)**

300 The RNeasy Mini Kit (Qiagen) was used to extract RNA and the OneStep RT-PCR Kit (Qiagen)  
301 was used to synthesize cDNA. Quantitative PCR was done using the ABI 7500 FAST qRT-PCR  
302 machine (Applied Biosystems) using the Taqman gene expression (Life Technologies) and  
303 SsoFast gene expression (Bio-rad) assays utilizing *Tbp* as an endogenous control. Primer  
304 sequences are listed in Supplemental Table 1. RQ (relative quantity) was determined using the  
305 cycling threshold for the gene of interest in control or untreated samples compared to the  
306 cycling threshold in experimental samples, calculated using the Applied Biosystems 7500 FAST  
307 v2.3 software.

### 308 **Western blot**

309 M-PER mammalian protein extraction reagent (GE Healthcare) was used to extract protein from  
310 mOSE cells and run on NuPAGE 4-12% Bis-Tris gradient gels (Life Technologies).  
311 Polyvinylidene difluoride membranes were used to transfer protein samples. Membranes were



312 blocked in 5% non-fat milk prior to antibody incubation. Antibody conditions are described in  
313 Supplemental Table 2. Western blots were developed using Clarity™ Western ECL Substrate  
314 (Bio-Rad) and the FluorChem FC2 imaging system (Alpha Innotech).

#### 315 **Stem cell PCR array**

316 mOSE cells ( $1 \times 10^6$  cells) were plated 24 hr prior to treatment with TGFB1 (10 ng/mL, R&D  
317 Systems). RNA was collected 7 days post-TGFB1 treatment (RNAeasy Kit, Qiagen). cDNA  
318 synthesis was performed using RT<sup>2</sup> First Strand Kit (Qiagen) and run on the RT<sup>2</sup> First Strand  
319 Kit (Stem cell PCR array) (Qiagen). The array was run in triplicate (N=3) and analyzed using the  
320 DataAnalysis Excel platform provided with the array kits.

#### 321 **Snail-overexpressing mOSE cells**

322 mOSE cells stably expressing reverse tetracycline-controlled transactivator (rtTA) protein were  
323 transduced with a lentiviral construct (pWPI) expressing the murine *Snai1* or *eGFP* under the  
324 control of a doxycycline-inducible promoter and the hygromycin resistance gene under the  
325 control of the *PGK* promoter. Transduced cells were selected for resistance to Hygromycin B.  
326 200ng/mL of doxycycline was added to cultures for 4 days prior to all experiments  
327 overexpressing Snail.

#### 328 **Primary sphere-forming assays**

329 For free-floating spheres, mOSE cells were cultured in stem cell media [Dulbecco's Modified  
330 Eagle's Medium: Nutrient Mixture F-12 (Sigma) supplemented with 1 X B27 supplement  
331 (Invitrogen), 0.02 µg/mL EGF (R&D Systems), 0.04 µg/mL fibroblast growth factor (FGF; R&D  
332 Systems), 4 µg/mL heparin (Sigma) and 0.01 mg/mL ITSS (Roche), and 2 µg/mL EGF (R&D  
333 Systems)] at  $5 \times 10^4$  cells/mL in non-adherent 24-well culture plates (Corning) and incubated at  
334 37 °C, 5% CO<sub>2</sub> for 14 days. Spheres were quantified using ImageJ using a pixel cutoff of >1000  
335 pixels and a circularity limit of 0.5-1.0. For spheres cultured in methylcellulose, mOSE cells were  
336 placed in a 1:1 mixture of methylcellulose and stem cell media at  $5 \times 10^4$  cells/mL in 24-well  
337 culture plates (Corning), and incubated at 37 °C, 5% CO<sub>2</sub> for 28 days.  
338 Methylcellulose-embedded spheres were quantified using ImageJ using a pixel cutoff of >500  
339 pixels and a circularity limit of 0.5-1.0. For each experiment, a minimum of 3 replicates were  
340 performed, each replicate was performed in three independent wells, spheres were counted in 4  
341 fields per well, and the average count was reported.

#### 342 **Secondary sphere-forming assay**

343 Primary free-floating mOSE spheres were collected and washed in PBS. Spheres were  
344 dissociated by first incubating in trypsin/PBS (Invitrogen) at 37 °C for 10 min, then by passing  
345 cells through a 25 gauge needle to obtain a single cell suspension. Single cell suspension was  
346 verified using phase contrast microscopy. Cells were washed in PBS, counted using a  
347 hemocytometer and plated in stem cell media at  $5 \times 10^4$  cells/mL. Cells were incubated in  
348 non-adherent 24-well culture plates (Corning) at 37 °C, 5% CO<sub>2</sub> for 14 days. Spheres were  
349 quantified using ImageJ using a pixel cutoff of >500 pixels and a circularity limit of 0.5-1.0.

#### 350 ***Brca1* deletion in mOSE cells**

351 mOSE cells were isolated from homozygous *Brca1*<sup>tm1Bm</sup> mice as described above and then  
352 infected with Ad-Cre to achieve *Brca1* knockout. Ad-GFP was used as a control. Cells were  
353 cultured for 1 week after infection prior to experimental use.

### 354 **BrdU pulse-chase**

355 *Brca1<sup>tm1Bm</sup>* mice were bred to *B6.129X1-Gt(ROSA)26Sor<sup>tm1(EYFP)Cos/J</sup>* mice to produce  
356 *Brca1<sup>fl/fl</sup>YFP* mice. *Brca1<sup>fl/fl</sup>YFP* mice were injected IB with Ad-Cre ( $8 \times 10^7$  PFU) or PBS on day 1  
357 and injected IP with BrdU (0.25 mg daily) on days 7-10. Ovaries were collected on day 40 and  
358 frozen in Optimal Cutting Temperature Compound.

### 359 **BrdU Immunofluorescence**

360 Frozen sections (5  $\mu$ m) were fixed using formalin-vapor fixation overnight at -20 °C. Samples  
361 were then hydrated in PBS and antigen retrieval performed using an antigen unmasking solution  
362 (ph 6.0, Vector) in a steam chamber (Hamilton Beach). Slides were then washed in PBS and  
363 blocked with 5% goat serum for 1 hr at room temperature. Primary antibodies against BRCA1  
364 (1:200, H-300, rabbit), GFP (1:1000, ab13970, chicken), and BrdU (1:200, ab6326, rat) were  
365 added and incubated overnight at 4 °C. Following a PBS wash, species-appropriate secondary  
366 antibodies (1:250, Alexafluor 594 nm or 488 nm) were incubated for 1 hr at room temperature.  
367 Slides underwent a final PBS wash and were mounted using Prolong Gold with DAPI  
368 (ThermoFisher). Positive cells were counted manually.

### 369 **RNA-seq sample preparation**

370 For TGFB1 treatment of monolayer cultures, mOSE cells were plated 24hrs prior to the addition  
371 of TGFB1 (10ng/mL, R&D Systems) and cells were collected after 4 days of treatment. For  
372 inducible *Snail* expression and *Brca1* deletion, cells were plated for 24hr prior to the addition of  
373 doxycycline (200 ng/mL, Sigma), and RNA was collected 4 days later. For sphere-forming  
374 conditions, mOSE cells ( $1 \times 10^6$ ) were first plated as monolayer cultures 24 hr prior to treatment  
375 with TGFB1 (10 ng/mL, R&D Systems). Four days after the addition of TGFB1, mOSE cells  
376 were then plated in free-floating sphere-forming conditions. Cells were maintained in  
377 sphere-forming cultures for 2 weeks prior to RNA collection (RNAeasy Kit, Qiagen). TGFB1 was  
378 replenished when placing mOSE cells in sphere-forming conditions.

### 379 **Library preparation and sequencing**

380 Total RNA was quantified using a NanoDrop Spectrophotometer ND-1000 (NanoDrop  
381 Technologies, Inc.) and its integrity was assessed on a 2100 Bioanalyzer (Agilent Technologies).  
382 Libraries were generated from 250 ng of total RNA as follows: mRNA enrichment was  
383 performed using the NEBNext Poly(A) Magnetic Isolation Module (New England BioLabs).  
384 cDNA synthesis was achieved with the NEBNext RNA First Strand Synthesis and NEBNext  
385 Ultra Directional RNA Second Strand Synthesis Modules (New England BioLabs). The  
386 remaining steps of library preparation were done using the NEBNext Ultra II DNA Library Prep  
387 Kit for Illumina (New England BioLabs). Adapters and PCR primers were purchased from New  
388 England BioLabs. Libraries were quantified using the Quant-iT™ PicoGreen® dsDNA Assay Kit  
389 (Life Technologies) and the Kapa Illumina GA with Revised Primers-SYBR Fast Universal kit  
390 (Kapa Biosystems). Average size fragment was determined using a LabChip GX (PerkinElmer)  
391 instrument.

392 The libraries were normalized, denatured in 0.05 N NaOH and then diluted to 200 pM and  
393 neutralized using HT1 buffer. ExAMP was added to the mix and the clustering was done on an  
394 Illumina cBot and the flowcell was run on a HiSeq 4000 for 2x100 cycles (paired-end mode)  
395 following the manufacturer's instructions. A phiX library was used as a control and mixed with

396 libraries at 1% level. The Illumina control software was HCS HD 3.4.0.38 and the real-time  
397 analysis program was RTA v. 2.7.7. The program bcl2fastq2 v2.18 was then used to demultiplex  
398 samples and generate fastq reads.

#### 399 **RNA-seq processing and differential expression**

400 Transcript quantification for each sample was performed using Kallisto (v0.45.0)<sup>38</sup> with the  
401 GRCm38 transcriptome reference and the -b 50 bootstrap option. The R package Sleuth  
402 (v0.30.0)<sup>39</sup> was then used to construct general linear models for the log-transformed expression  
403 of each gene across experimental conditions. Wald's test was used to test for significant  
404 variables for each gene and the resultant p-values were adjusted to q-values using the  
405 Benjamini-Hochberg false discovery rate method. Significant genes were defined as genes with  
406 a q-value < 0.05. An effect size (beta coefficient of the regression model) cutoff of >0.5 or <-0.5  
407 was also used for each data set.

#### 408 **Gene set enrichment analysis and pathway activity inference**

409 GSEA was performed with the R package fgsea (v1.13.5)<sup>40</sup>. GO terms, KEGG pathways,  
410 Reactome pathways, and Hallmark genesets were collected from the Molecular Signatures  
411 Database (MSigDB)<sup>22,23</sup> and used to query differential expression results ranked by fold change.  
412 All gene sets discussed in the manuscript have a significant enrichment (Benjamini-Hochberg  
413 adjust p-value <0.05). For pathway activity inference, we used the R package PROGENy  
414 (v1.9.6)<sup>41</sup>. Pathway activity was compared between experimental conditions using a simple  
415 linear model and p-values were adjusted using the Benjamini-Hochberg false detection rate  
416 method.

#### 417 **CD44 cell sorting**

418 mOSE cells were treated with TGFB1 (10 ng/mL, 2 days) prior to collecting cells for FACS. Cells  
419 ( $1 \times 10^7$ ) were trypsinized and a single-cell suspension was made using a 40  $\mu$ m cell strainer.  
420 Cells were labelled and sorted as previously described<sup>18</sup>. Briefly, cells were resuspended in a  
421 flow buffer (4% FBS in PBS) and incubated with anti-CD44 conjugated to allophycocyanin  
422 (1:5000; eBioscience, San Diego, CA) for 15 min at 4 °C. Unbound antibody was removed with  
423 washing buffer and the fraction of cells with surface protein labeled with CD44 antibody was  
424 determined using a MoFlo cell sorter (Dako Cytomation).

#### 425 **Data availability**

426 Raw sequencing files have been deposited and are available along with processed transcript  
427 quantifications at GSE122875.

#### 428 **Acknowledgments**

429 We thank the tissue donors for making this research possible. We also thank Dr. Ken Garson for  
430 generating mOSE cells with inducible *Snail* and inducible *GFP* expression. We wish to  
431 acknowledge the contribution of staff of the McGill University and Génome Québec Innovation  
432 Centre (Montreal, QC) for performing library preparation and sequencing associated with  
433 RNA-seq experiments. We also wish to acknowledge StemCore Laboratories (Ottawa, ON) for  
434 performing the FACS of CD44-positive mOSE cells. This work was supported by grants from the  
435 Canadian Institutes of Health Research and the National Science and Engineering Research  
436 Council (BCV). L.E.C. and L.F.G. were supported by Ontario Graduate Scholarships, D.P.C. by

437 a Frederick Banting and Charles Best Doctoral Award (CIHR), and C.W.M. by the Vanier  
438 Canada Graduate Scholarship.

### 439 **Author Contributions**

440 L.E.C. and B.C.V. conceived the study. L.E.C., D.P.C., and B.C.V. interpreted results and wrote  
441 the manuscript. L.E.C., L.F.G., O.C., H.A.D., and T.D. performed cell culture experiments, qPCR  
442 analysis, and western blots. O.C. derived mOSE and hOSE cultures. C.W.M. performed mouse  
443 experiments and immunofluorescence. D.P.C. and L.E.C. performed all computational analysis.

### 444 **Competing Interests**

445 The authors declare no competing interests.

### 446 **References**

- 447 1. Barker, N., van de Wetering, M. & Clevers, H. The intestinal stem cell. *Genes Dev.* **22**,  
448 1856–1864 (2008).
- 449 2. Tata, P. R. *et al.* Dedifferentiation of committed epithelial cells into stem cells in vivo. *Nature*  
450 **503**, 218–223 (2013).
- 451 3. Herrick, S. E. & Mutsaers, S. E. The potential of mesothelial cells in tissue engineering and  
452 regenerative medicine applications. *Int. J. Artif. Organs* **30**, 527–540 (2007).
- 453 4. Singavarapu, R., Buchinsky, N., Cheon, D. J. & Orsulic, S. Whole ovary  
454 immunohistochemistry for monitoring cell proliferation and ovulatory wound repair in the  
455 mouse. *Reprod. Biol. Endocrinol.* **8**, 98 (2010).
- 456 5. Murdoch, W. J. Ovarian surface epithelium during ovulatory and anovulatory bovine estrous  
457 cycles. *Anat. Rec.* **240**, 322–326 (1994).
- 458 6. Bjersing, L. & Cajander, S. Ovulation and the role of the ovarian surface epithelium.  
459 *Experientia* **31**, 605–608 (1975).
- 460 7. Wright, J. W., Jurevic, L. & Stouffer, R. L. Dynamics of the primate ovarian surface  
461 epithelium during the ovulatory menstrual cycle. *Hum. Reprod.* **26**, 1408–1421 (2011).
- 462 8. Ng, A. & Barker, N. Ovary and fimbrial stem cells: biology, niche and cancer origins. *Nat.*  
463 *Rev. Mol. Cell Biol.* **16**, 625–638 (2015).

- 464 9. Auersperg, N. The stem-cell profile of ovarian surface epithelium is reproduced in the  
465 oviductal fimbriae, with increased stem-cell marker density in distal parts of the fimbriae. *Int.*  
466 *J. Gynecol. Pathol.* **32**, 444–453 (2013).
- 467 10. Gamwell, L. F., Collins, O. & Vanderhyden, B. C. The mouse ovarian surface epithelium  
468 contains a population of LY6A (SCA-1) expressing progenitor cells that are regulated by  
469 ovulation-associated factors. *Biol. Reprod.* **87**, 80 (2012).
- 470 11. Flesken-Nikitin, A. *et al.* Ovarian surface epithelium at the junction area contains a  
471 cancer-prone stem cell niche. *Nature* **495**, 241–245 (2013).
- 472 12. Mani, S. A. *et al.* The epithelial-mesenchymal transition generates cells with properties of  
473 stem cells. *Cell* **133**, 704–715 (2008).
- 474 13. Haensel, D. & Dai, X. Epithelial-to-mesenchymal transition in cutaneous wound healing:  
475 Where we are and where we are heading. *Dev. Dyn.* **247**, 473–480 (2018).
- 476 14. Shaw, T. J. & Martin, P. Wound repair: a showcase for cell plasticity and migration. *Curr.*  
477 *Opin. Cell Biol.* **42**, 29–37 (2016).
- 478 15. Knight, P. G. & Glister, C. TGF- $\beta$  superfamily members and ovarian follicle development.  
479 *Reproduction* vol. 132 191–206 (2006).
- 480 16. Carter, L. E. *et al.* COX2 is induced in the ovarian epithelium during ovulatory wound repair  
481 and promotes cell survival†. *Biol. Reprod.* **101**, 961–974 (2019).
- 482 17. Hebbard, L. *et al.* CD44 expression and regulation during mammary gland development  
483 and function. *J. Cell Sci.* **113 ( Pt 14)**, 2619–2630 (2000).
- 484 18. Alwosaibai, K. *et al.* PAX2 maintains the differentiation of mouse oviductal epithelium and  
485 inhibits the transition to a stem cell-like state. *Oncotarget* **8**, 76881–76897 (2017).
- 486 19. Herheliuk, T., Perepelytsina, O., Ugnivenko, A., Ostapchenko, L. & Sydorenko, M.  
487 Investigation of multicellular tumor spheroids enriched for a cancer stem cell phenotype.



- 488 *Stem Cell Investig* **6**, 21 (2019).
- 489 20. Robertson, F. M. *et al.* Imaging and analysis of 3D tumor spheroids enriched for a cancer  
490 stem cell phenotype. *J. Biomol. Screen.* **15**, 820–829 (2010).
- 491 21. Liao, M.-J. *et al.* Enrichment of a population of mammary gland cells that form  
492 mammospheres and have in vivo repopulating activity. *Cancer Res.* **67**, 8131–8138 (2007).
- 493 22. Subramanian, A. *et al.* Gene set enrichment analysis: a knowledge-based approach for  
494 interpreting genome-wide expression profiles. *Proc. Natl. Acad. Sci. U. S. A.* **102**,  
495 15545–15550 (2005).
- 496 23. Liberzon, A. *et al.* The Molecular Signatures Database (MSigDB) hallmark gene set  
497 collection. *Cell Syst* **1**, 417–425 (2015).
- 498 24. Luo, K. Signaling Cross Talk between TGF- $\beta$ /Smad and Other Signaling Pathways. *Cold*  
499 *Spring Harb. Perspect. Biol.* **9**, (2017).
- 500 25. Cook, D. P. & Vanderhyden, B. C. Context specificity of the EMT transcriptional response.  
501 *Nat. Commun.* **11**, 1–9 (2020).
- 502 26. Tacha, D., Zhou, D. & Cheng, L. Expression of PAX8 in normal and neoplastic tissues: a  
503 comprehensive immunohistochemical study. *Appl. Immunohistochem. Mol. Morphol.* **19**,  
504 293–299 (2011).
- 505 27. Hodgkinson, K. *et al.* GREB1 is an estrogen receptor-regulated tumour promoter that is  
506 frequently expressed in ovarian cancer. *Oncogene* **37**, 5873–5886 (2018).
- 507 28. Bai, F. *et al.* BRCA1 suppresses epithelial-to-mesenchymal transition and stem cell  
508 dedifferentiation during mammary and tumor development. *Cancer Res.* **74**, 6161–6172  
509 (2014).
- 510 29. Di Zazzo, E. *et al.* Estrogen Receptors in Epithelial-Mesenchymal Transition of Prostate  
511 Cancer. *Cancers* **11**, (2019).

- 512 30. Peris-Torres, C. *et al.* Extracellular Protease ADAMTS1 Is Required at Early Stages of  
513 Human Uveal Melanoma Development by Inducing Stemness and Endothelial-Like  
514 Features on Tumor Cells. *Cancers* **12**, (2020).
- 515 31. Rafehi, S. *et al.* TGF $\beta$  signaling regulates epithelial-mesenchymal plasticity in ovarian  
516 cancer ascites-derived spheroids. *Endocr. Relat. Cancer* **23**, 147–159 (2016).
- 517 32. Wilson, M. M., Weinberg, R. A., Lees, J. A. & Guen, V. J. Emerging Mechanisms by which  
518 EMT Programs Control Stemness. *Trends Cancer Res.* (2020)  
519 doi:10.1016/j.trecan.2020.03.011.
- 520 33. Ocaña, O. H. *et al.* Metastatic colonization requires the repression of the  
521 epithelial-mesenchymal transition inducer Prrx1. *Cancer Cell* **22**, 709–724 (2012).
- 522 34. Beumer, J. & Clevers, H. Regulation and plasticity of intestinal stem cells during  
523 homeostasis and regeneration. *Development* **143**, 3639–3649 (2016).
- 524 35. Brandt, R. *et al.* Cell type-dependent differential activation of ERK by oncogenic KRAS in  
525 colon cancer and intestinal epithelium. *Nat. Commun.* **10**, 2919 (2019).
- 526 36. Castiello, L. *et al.* Disruption of IFN-I Signaling Promotes HER2/Neu Tumor Progression  
527 and Breast Cancer Stem Cells. *Cancer Immunol Res* **6**, 658–670 (2018).
- 528 37. Tonary, A. M., Macdonald, E. A., Faught, W., Senterman, M. K. & Vanderhyden, B. C. Lack  
529 of expression of c-KIT in ovarian cancers is associated with poor prognosis. *Int J Cancer*  
530 **89**, 242–250 (2000).
- 531 38. Bray, N. L., Pimentel, H., Melsted, P. & Pachter, L. Near-optimal probabilistic RNA-seq  
532 quantification. *Nat. Biotechnol.* **34**, 525–527 (2016).
- 533 39. Pimentel, H., Bray, N. L., Puente, S., Melsted, P. & Pachter, L. Differential analysis of  
534 RNA-seq incorporating quantification uncertainty. *Nat. Methods* **14**, 687–690 (2017).
- 535 40. Korotkevich, G., Sukhov, V. & Sergushichev, A. Fast gene set enrichment analysis.

536 doi:10.1101/060012.

537 41. Schubert, M. *et al.* Perturbation-response genes reveal signaling footprints in cancer gene

538 expression. *Nat. Commun.* **9**, 20 (2018).

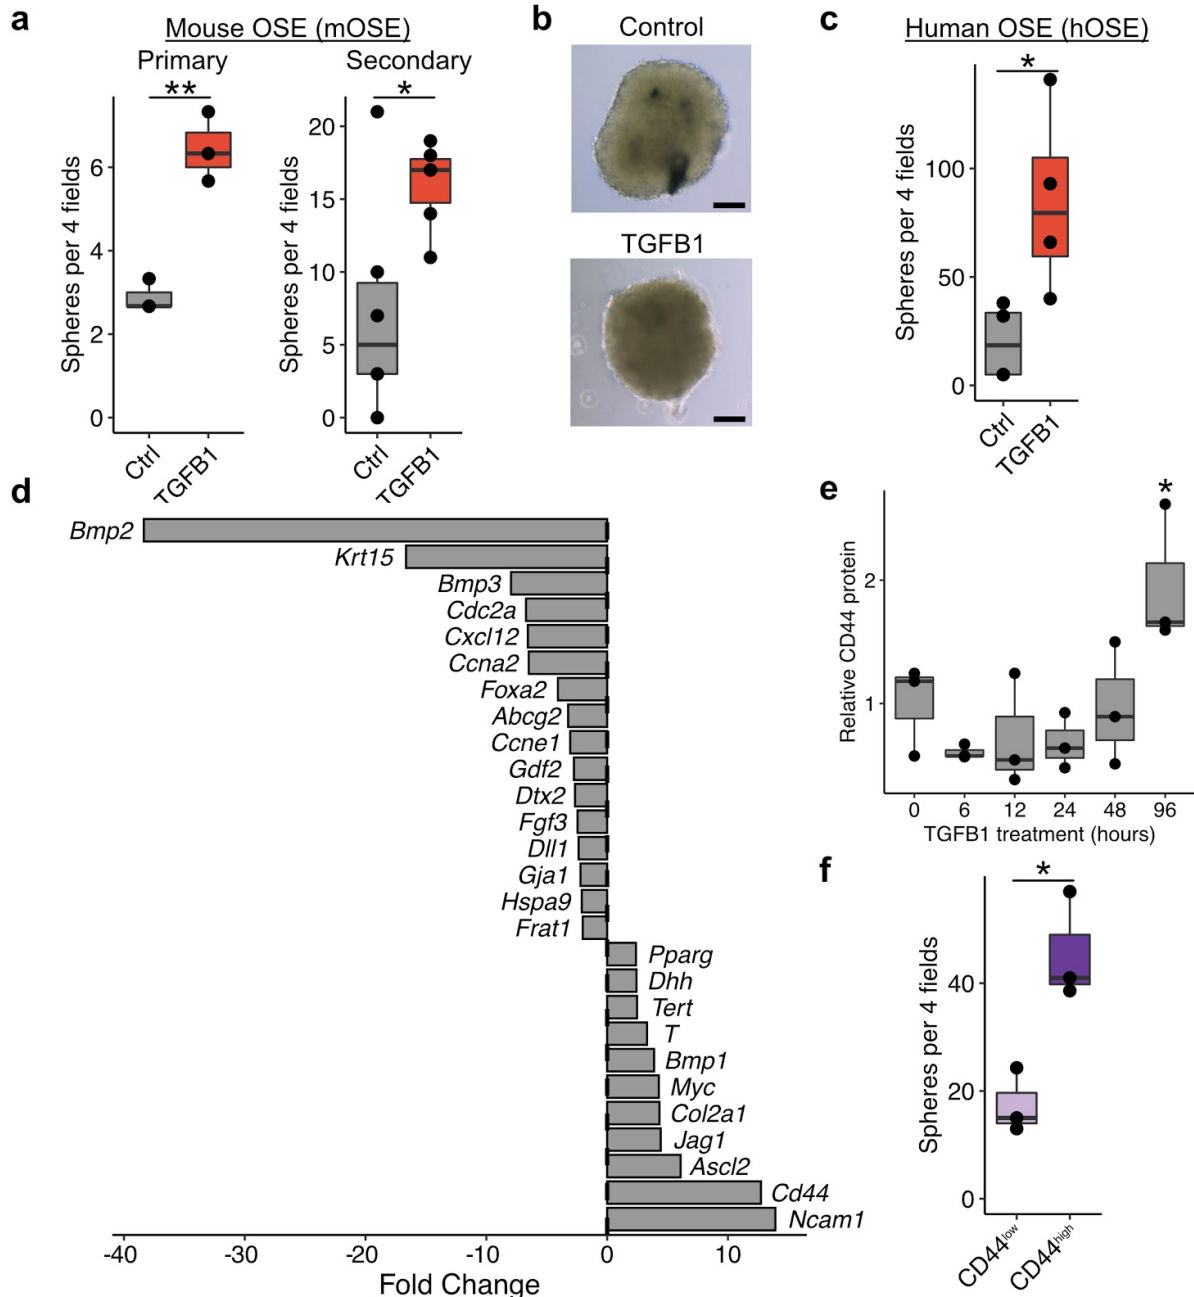

539 **Figure 1. TGFβ1 promotes stemness in the OSE.** **a.** Primary (left) and secondary (right)  
 540 sphere-forming capacity of mOSE cells treated with TGFβ1 (10ng/mL). Data points represent  
 541 the average number of spheres per 4 fields of view for each replicate. **b.** Phase contrast images  
 542 of control and TGFβ1-treated spheroids. Scale bar=100μm. **c.** Primary sphere-forming capacity  
 543 of human OSE treated with TGFβ1. **d.** Fold change values for a panel of putative stem cell  
 544 markers in mOSE treated with TGFβ1 for 4 days. **e.** Relative protein quantifications of CD44  
 545 throughout a time course of TGFβ1 treatment in mOSE. Quantifications represent western blot  
 546 pixel densitometry, normalized to B-actin and scaled to the mean intensity in untreated samples.  
 547 A representative blot is included in Supplemental Figure 2b. **f.** Primary sphere-forming capacity  
 548 of CD44<sup>-</sup> and CD44<sup>+</sup> mOSE cells. All boxplots show median value (horizontal black line),

549 estimated 25th and 75th percentiles, and whiskers represent 1.5 times the interquartile range.  
550 Linear regression models were used for all statistical tests. \*  $p < 0.05$ , \*\*  $p < 0.01$ .



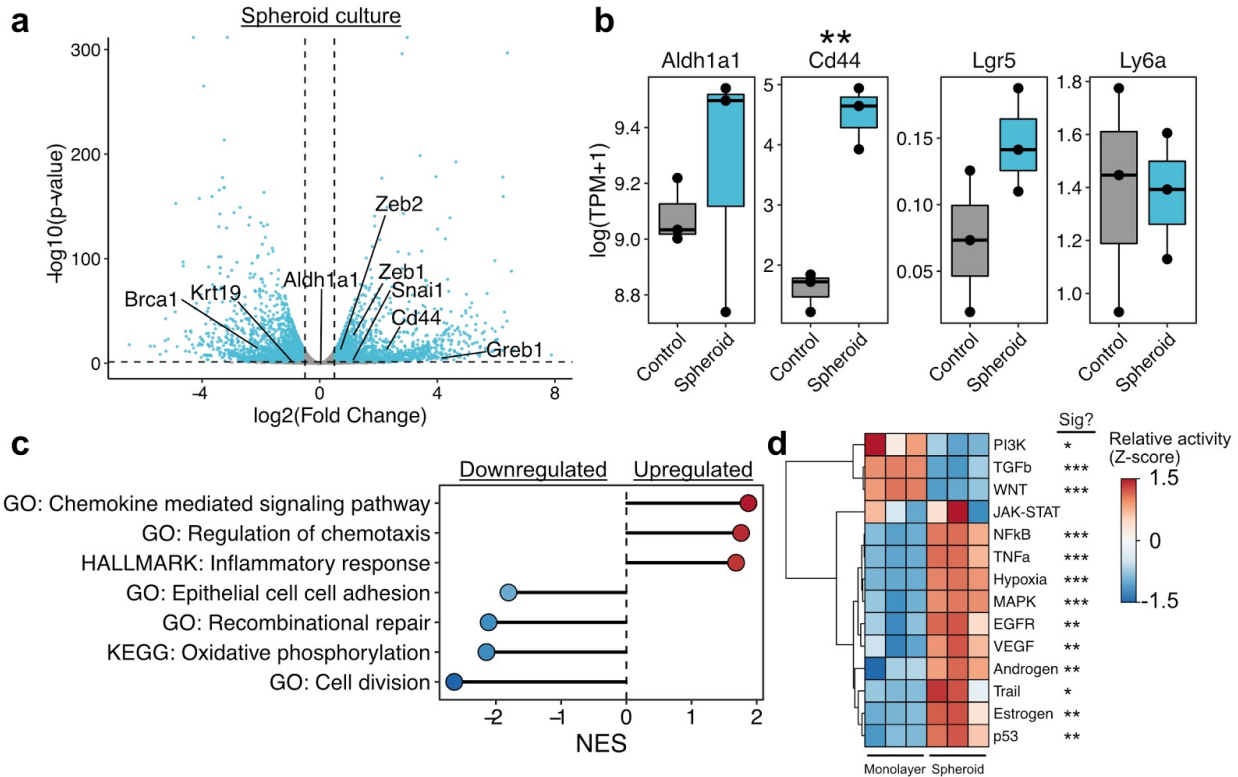

551 **Figure 2. Transcriptional profile of intrinsic mOSE stemness.** **a.** Plot showing the  
 552 distribution of differentially expressed genes in mOSE cells cultured as spheroids relative to a  
 553 monolayer. Each point corresponds to a single gene. Selected genes related to stemness  
 554 and/or the EMT are highlighted on the plot. Dashed lines correspond to significance criteria  
 555 (absolute log fold change > 0.5,  $p < 0.05$ ). **b.** Boxplots showing the expression values of putative  
 556 mOSE stemness markers in mOSE cells cultured in a monolayer (Control) or as spheroids.  
 557 Boxplots show median value (horizontal black line), estimated 25th and 75th percentiles, and  
 558 whiskers represent 1.5 times the interquartile range **c.** GSEA results for selected gene sets  
 559 enriched in differentially expressed genes in mOSE spheroids. All gene sets are significantly  
 560 enriched ( $p < 0.05$ ) and normalized enrichment scores (NES) are shown. **d.** Inferred pathway  
 561 activity in monolayer- and spheroid-cultured mOSE cells. Linear models were used for statistical  
 562 testing for (b) and (d). \*  $p < 0.05$ , \*\*  $p < 0.01$ , \*\*\*  $p < 0.001$ .

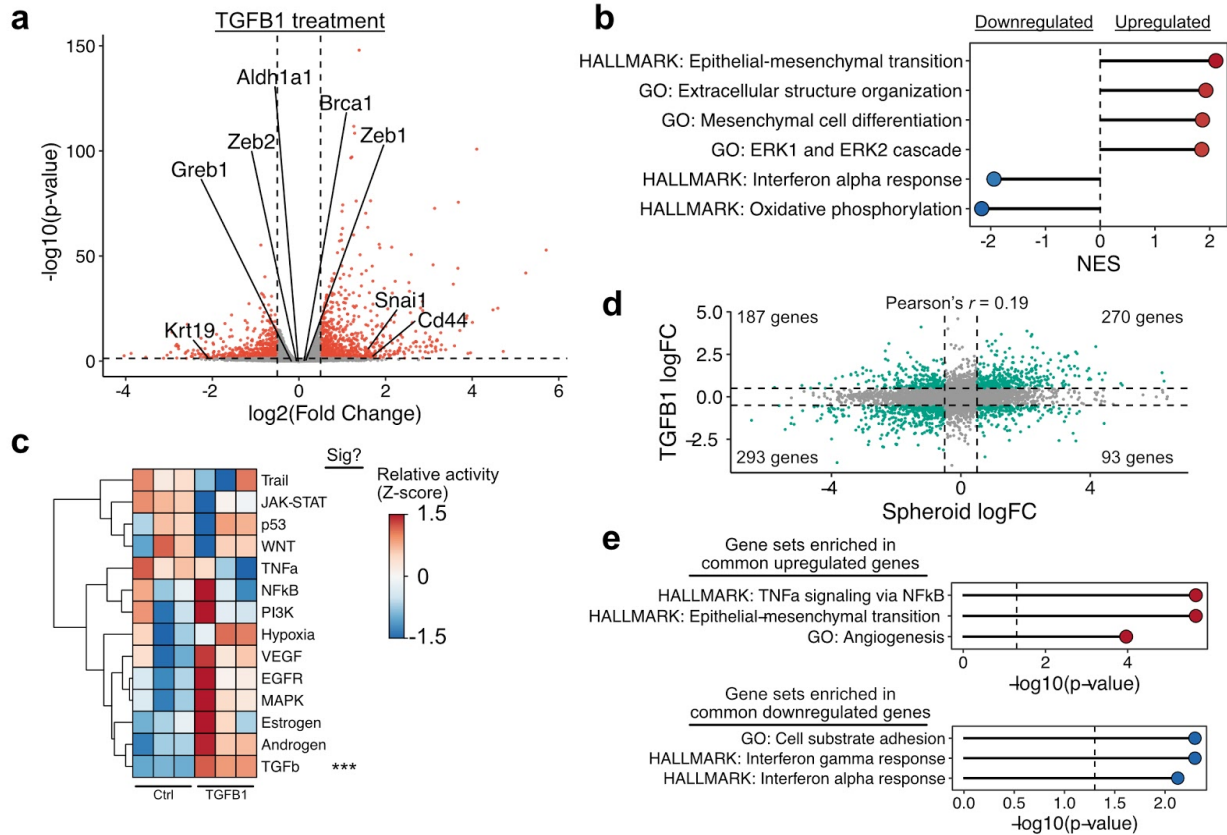

563 **Figure 3. TGFβ1 promotes a distinct stemness phenotype.** **a.** Plot showing the distribution  
564 of differentially expressed genes in monolayers of mOSE cells treated with TGFβ1 compared to  
565 untreated samples. Each point corresponds to a single gene. Selected genes related to  
566 stemness and/or the EMT are highlighted on the plot. Dashed lines correspond to significance  
567 criteria (absolute log fold change > 0.5,  $p < 0.05$ ). **b.** GSEA results for selected gene sets  
568 enriched in differentially expressed genes following TGFβ1 treatment. All gene sets are  
569 significantly enriched ( $p < 0.05$ ) and NES values are shown. **c.** Inferred pathway activity in  
570 untreated and TGFβ1-treated mOSE cells.  $P$ -values were computed from the  $t$  statistic of a  
571 linear regression model and were adjusted using the Benjamini-Hochberg false discovery rate  
572 (FDR) method. **d.** Plot comparing log fold-change values for spheroid-cultured and  
573 TGFβ1-treated mOSE. Dashed lines correspond to fold change cutoffs used to assess  
574 significance. **e.** Plots showing gene sets enriched in commonly up- or downregulated genes  
575 following both TGFβ1 treatment and spheroid culture.  $P$ -values were calculated using a Fisher  
576 exact test and were adjusted using the Benjamini-Hochberg FDR method.

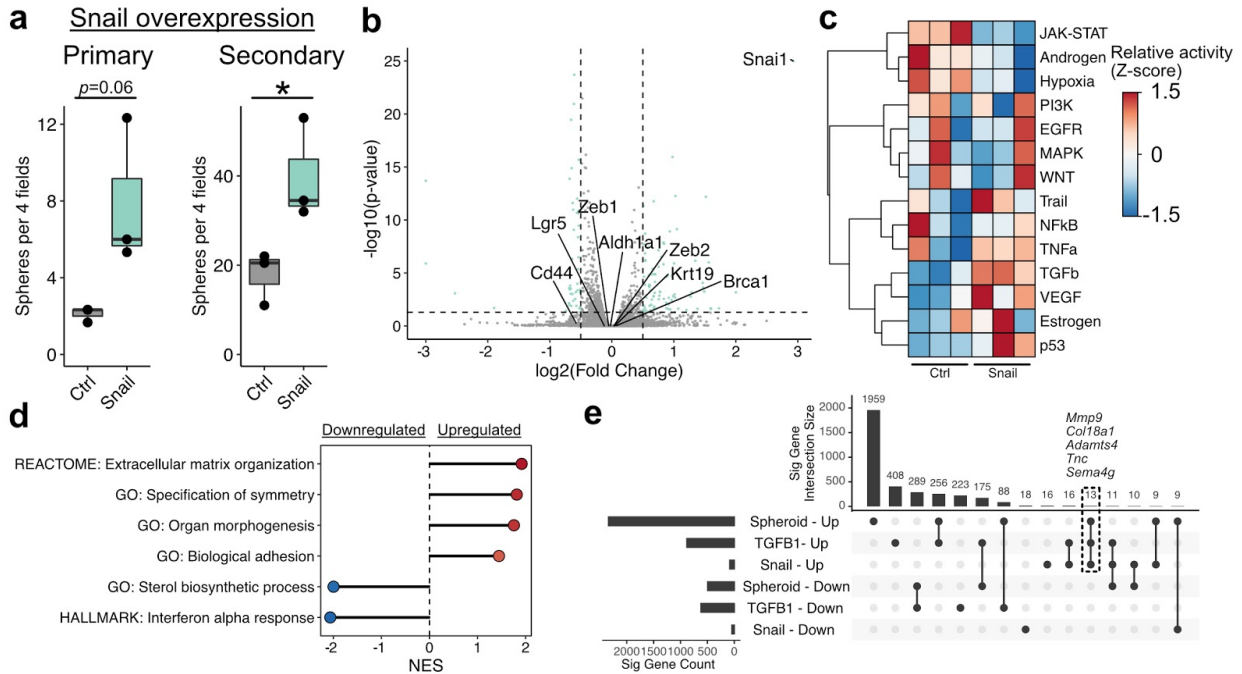

577 **Figure 4. Snail overexpression promotes stemness with minimal gene expression**  
578 **changes.** **a.** Primary (left) and secondary (right) sphere forming capacity of mOSE cells  
579 overexpressing Snail. Data points represent the average number of spheres per 4 fields of view  
580 for each replicate. Boxplots show median value (horizontal black line), estimated 25th and 75th  
581 percentiles, and whiskers represent 1.5 times the interquartile range. **b.** Plot showing the  
582 distribution of differentially expressed genes following Snail overexpression. Each point  
583 corresponds to a single gene. Selected genes related to stemness and/or the EMT are  
584 highlighted on the plot. Dashed lines correspond to significance criteria (absolute log fold  
585 change > 0.5,  $p < 0.05$ ). **c.** Inferred pathway activity in control and Snail-overexpressing mOSE  
586 cells.  $P$ -values were computed from the  $t$  statistic of a linear regression model and were  
587 adjusted using the Benjamini-Hochberg FDR method. No pathway is significantly different  
588 between conditions. **d.** GSEA results for selected gene sets enriched in differentially expressed  
589 genes following Snail overexpression. All gene sets are significantly enriched ( $p < 0.05$ ) and NES  
590 values are shown. **e.** UpSet plot showing overlaps in differentially expressed genes between all  
591 conditions assessed ranked by the condition/overlap with the largest number of genes. The top  
592 chart shows the intersection size for the conditions highlighted in the middle grid. A single,  
593 unconnected point corresponds to genes unique to only that condition. The total number of  
594 differentially expressed genes in each condition is shown in the left chart.

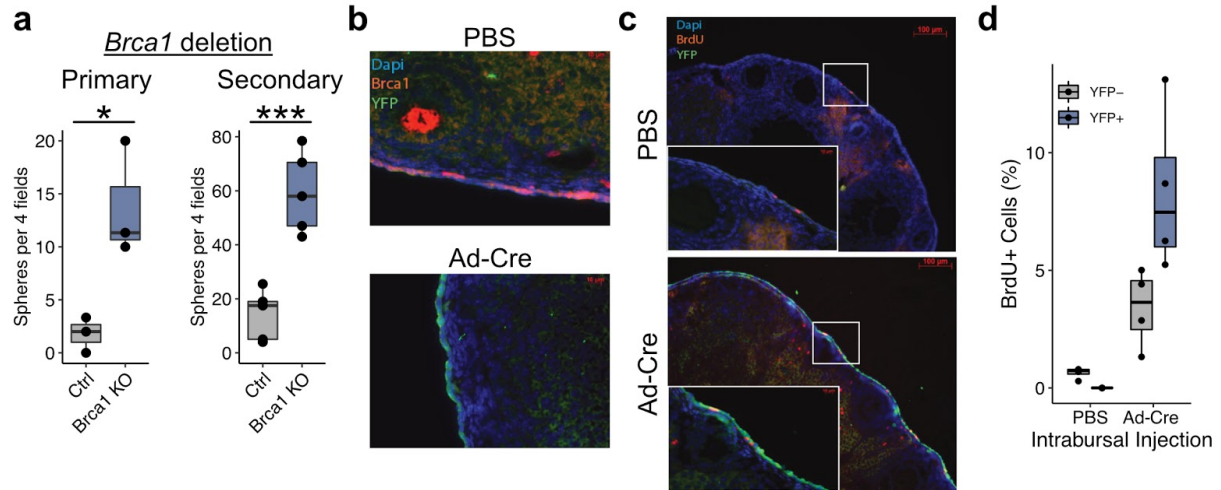

595 **Figure 5. *Brca1* deletion *in vivo* promotes increased label retention.** **a.** Primary (left) and  
596 secondary (right) sphere forming capacity of mOSE cells following *Brca1* deletion by infection  
597 with Ad-Cre (*Brca1* KO). Cells infected with Ad-GFP were used as a control (Ctrl). Data points  
598 represent the average number of spheres per 4 fields of view for each replicate. **b.**  
599 Immunohistochemical staining of ovaries following intrabursal injection of PBS or Ad-Cre.  
600 Staining shows BRCA1 (red) and the YFP (green) reporter activated upon delivery of Cre  
601 recombinase. Nuclei are stained with DAPI (blue). Scale bar = 10µm. **c.** BrdU label retention  
602 (red) and YFP (green) signal in ovaries following intrabursal injection of either PBS or Ad-Cre.  
603 Scale bar = 100µm. **d.** Quantification of both BrdU+ cells in ovaries. All boxplots show median  
604 value (horizontal black line), estimated 25th and 75th percentiles, and whiskers represent 1.5  
605 times the interquartile range.

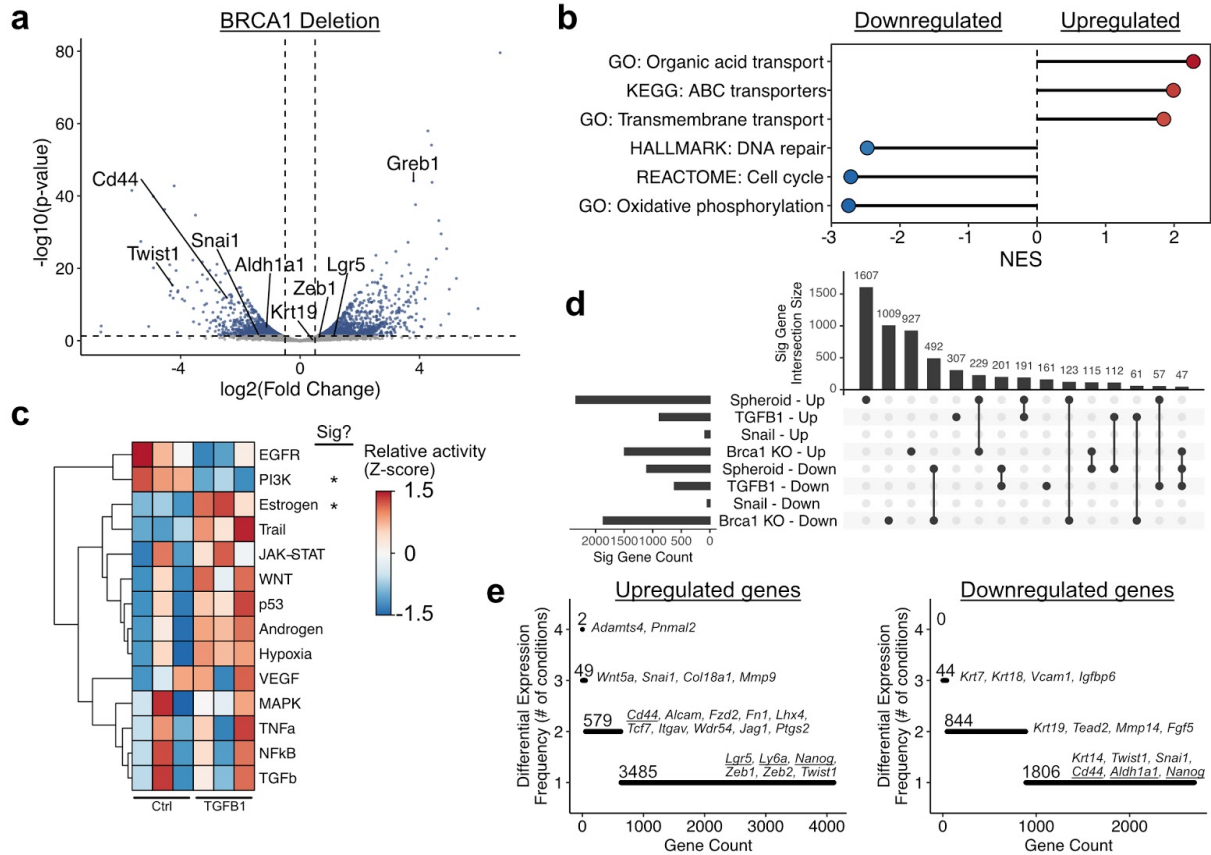

606 **Figure 6. Stemness phenotypes are transcriptionally diverse.** **a.** Plot showing the  
607 distribution of differentially expressed genes following *Brca1* deletion by infection with Ad-Cre.  
608 Each point corresponds to a single gene. Selected genes related to stemness and/or the EMT  
609 are highlighted on the plot. Dashed lines correspond to significance criteria (absolute log fold  
610 change > 0.5,  $p < 0.05$ ). **b.** GSEA results for selected gene sets enriched in differentially  
611 expressed genes following *Brca1* deletion. All gene sets are significantly enriched ( $p < 0.05$ ) and  
612 NES values are shown. **c.** Inferred pathway activity in control and Snail-overexpressing mOSE  
613 cells.  $P$ -values were computed from the  $t$  statistic of a linear regression model and were  
614 adjusted using the Benjamini-Hochberg FDR method. **d.** UpSet plot showing overlaps in  
615 differentially expressed genes between all conditions assessed ranked by the condition/overlap  
616 with the largest number of genes. **e.** Plots showing the number of assessed conditions that  
617 genes are either activated or repressed in. Selected genes are listed and putative stemness  
618 markers are underlined.



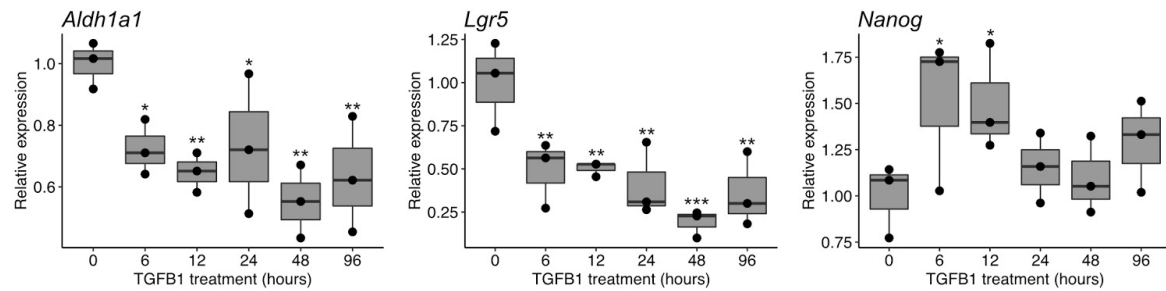

619 **Supplemental Figure 1. Expression of stemness markers through a time course of TGFB1**  
620 **treatment.** qPCR results showing expression of stemness genes following varying lengths of  
621 TGFB1 treatment. Boxplots show median value (horizontal black line), estimated 25th and 75th  
622 percentiles, and whiskers represent 1.5 times the interquartile range. *P*-values were computed  
623 from the *t* statistic of a linear regression model. \*  $p < 0.05$ , \*\*  $p < 0.01$ , \*\*\*  $p < 0.001$ .



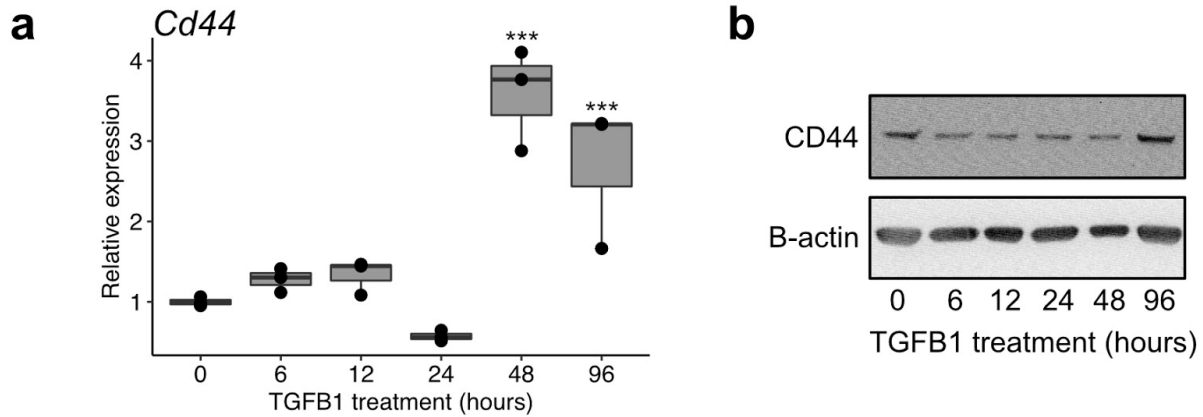

624 **Supplemental Figure 2. CD44 increases following TGFB1 treatment.** **a.** qPCR results  
625 showing expression of *Cd44* following varying periods of TGFB1 treatment. Boxplots show  
626 median value (horizontal black line), estimated 25th and 75th percentiles, and whiskers  
627 represent 1.5 times the interquartile range. *P*-values were computed from the *t* statistic of a  
628 linear regression model. \*  $p < 0.05$ , \*\*  $p < 0.01$ , \*\*\*  $p < 0.001$ . **b.** Representative western blot of  
629 CD44 and B-actin following following varying periods of TGFB1 treatment. Densitometric  
630 quantifications of three blots are included in Figure 1e.

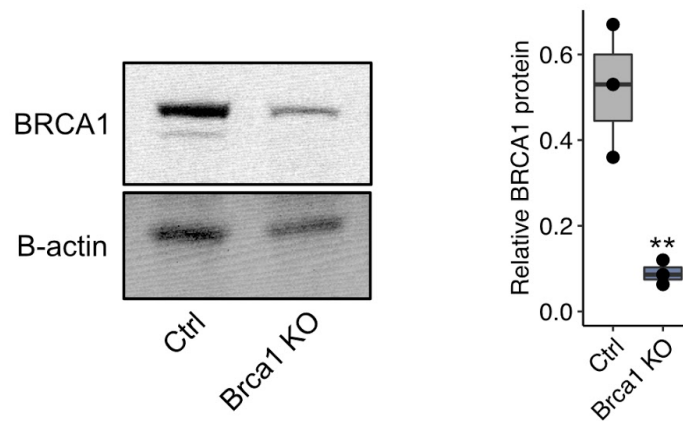

631 **Supplemental Figure 3. *Brca1* is efficiently deleted following the expression of Cre**  
632 **recombinase. a.** Western blot of BRCA1 and B-actin of *Brca1<sup>fl/fl</sup>* mOSE cells following infection  
633 with either Ad-GFP (Ctrl) or Ad-Cre (*Brca1* KO). **b.** Boxplot of relative BRCA1 protein  
634 quantifications from pixel densitometry. N=3 independent infections with Ad-GFP or Ad-Cre.  
635 Boxplots show median value (horizontal black line), estimated 25th and 75th percentiles, and  
636 whiskers represent 1.5 times the interquartile range. *P*-values were computed from the *t* statistic  
637 of a linear regression model. \*\*  $p < 0.01$ .
